# Supplementary material for: Increasing CB2 Receptor Activity after Early Life Stress Prevents Depressive Behavior in Female Rats
Source: MDPI journal article supplement (doi:10.3390/biom14040464), 2024-04-10
Supplement: s1 [file s1]

**Supplementary information:**

Figure S1. Western immunoblot of MARCH7 with VCP control.

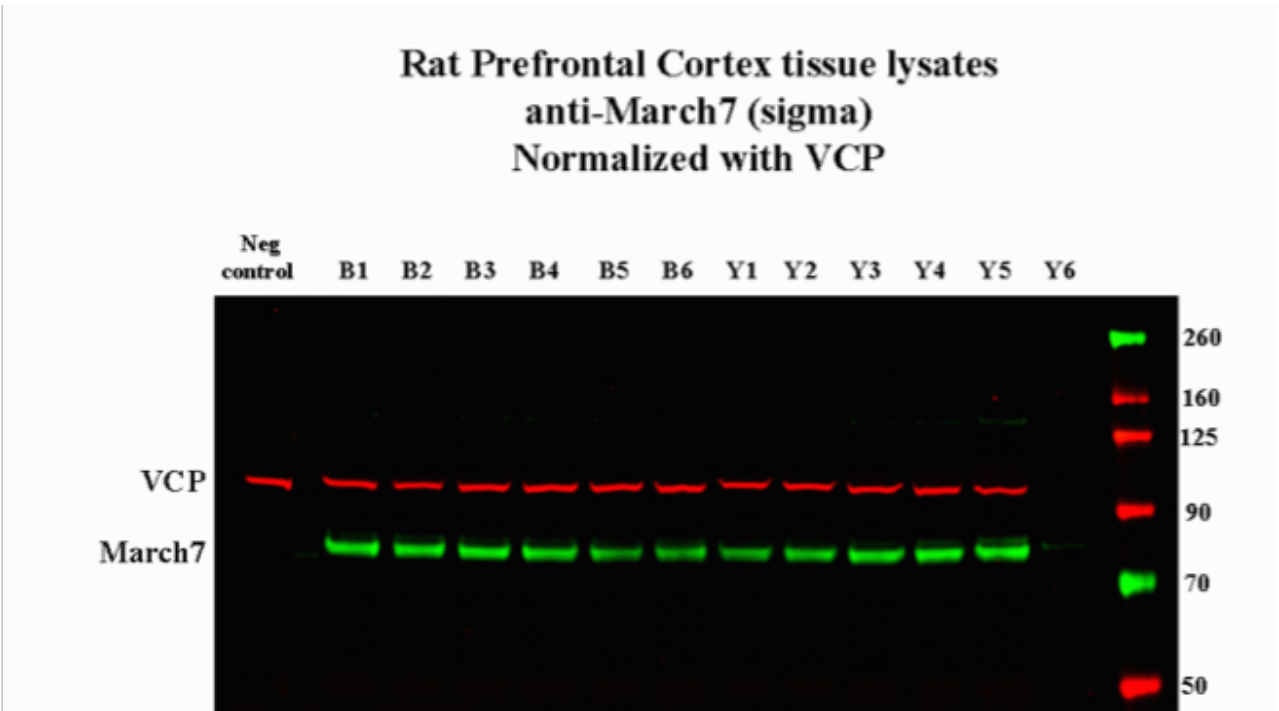

Controls: B1-B6; Maternal Separation Y1-Y6. Marker
